# Supplementary material for: Long non-coding RNA AK058003, as a precursor of miR-15a, interacts with HuR to inhibit the expression of Υ-synuclein in hepatocellular carcinoma cells
Source: PubMed Central journal article supplement (PMC5354744; doi:10.18632/oncotarget.14276), 2016-12-27
Supplement: oncotarget-08-9451-s001.pdf [file oncotarget-08-9451-s001.pdf]

## Long non-coding RNA AK058003, as a precursor of miR-15a, interacts with HuR to inhibit the expression of $\gamma$ -synuclein in hepatocellular carcinoma cells

### Supplementary Materials

**Supplementary Table S1: miRNA binding sites of SNCG by starBase v2.0**

| Position | Seq-target              | Name            |
|----------|-------------------------|-----------------|
| 42       | TGGCAGTGTCTTAGCTGGTTGT  | hsa-miR-34a-5p  |
| 62       | ACAGCAGGCACAGACAGGCAGT  | hsa-miR-214-3p  |
| 62       | AGCAGCATTGTACAGGGCTATCA | hsa-miR-107     |
| 42       | AGGCAGTGTAGTTAGCTGATTGC | hsa-miR-34c-5p  |
| 62,77    | TAGCAGCACGTAATATTGGCG   | hsa-miR-16-5p   |
| 62,77    | TAGCAGCACATAATGGTTTGTG  | hsa-miR-15a-5p  |
| 42       | AGGTTGTCCGTGGTGAGTTCGCA | hsa-miR-323b-5p |
| 62,77    | TAGCAGCACAGAAATATTGGC   | hsa-miR-195-5p  |
| 42,62,77 | CAGCAGCACACTGTGGTTTGT   | hsa-miR-497-5p  |
| 62       | TTCACAGTGGCTAAGTTCCGC   | hsa-miR-27a-3p  |
| 62       | AGCAGCATTGTACAGGGCTATGA | hsa-miR-103a-3p |
| 39       | TAAGGCACGCGGTGAATGCC    | hsa-miR-124-3p  |
| 62,77    | TAGCAGCACATCATGGTTTACA  | hsa-miR-15b-5p  |
| 42       | TGGCAGTGTATTGTTAGCTGGT  | hsa-miR-449a    |
| 42       | AGGCAGTGTATTGTTAGCTGGC  | hsa-miR-449b-5p |
| 62       | TTCACAGTGGCTAAGTTCTGC   | hsa-miR-27b-3p  |
| 62,77    | CAGCAGCAATTCATGTTTTGAA  | hsa-miR-424-5p  |

**Supplementary Table S2: The sequence of siRNA**

| Gene symble         | Sequence                         |
|---------------------|----------------------------------|
| lncRNA-AK058003-si1 |                                  |
| sense               | 5'-CCACCAGUUACCUGCAAUATT dTdT-3' |
| antisense           | 3'-dTdT TTGGUGGUCAAUGGACGUUAU-5' |
| lncRNA-AK058003-si2 |                                  |
| sense               | 5'-GGAACAAAGAUGGUUUCUATT dTdT-3' |
| antisense           | 3'-dTdT TTCCUUGUUUCUACCAAAGAU-5' |
| SNCG-si1            |                                  |
| sense               | 5'-GGUGAGGCAUCCAAAGAGA dTdT-3'   |
| antisense           | 3'-dTdT CCACUCCGUAGGUUUCUCU-5'   |
| SNCG-si2            |                                  |
| sense               | 5'-GACCAAGGAGAAUGUUGUA dTdT -3'  |
| antisense           | 3'-dTdT CUGGUUCCUCUUACAACAU-5'   |
| SNCG-si3            |                                  |
| sense               | 5'- UGACGGAAGCAGCUGAGAA dTdT -3' |
| antisense           | 3'-dTdT ACUGCCUUCGUCGACUCUU-5'   |

**Supplementary Table S3: Genes and primer sequences**

| Gene symbol              | Sequence(from 5' to 3')                                                                                              |
|--------------------------|----------------------------------------------------------------------------------------------------------------------|
| LncRNA-AK058003          | F: GGGAACAAAGATGGTTTCTACGT<br>R: ACTGGTTCATAGTTAGGCTGGAT                                                             |
| SNCG                     | F: CGTGAGCGAGGCTGTGGTGA<br>R:TCCTCTGCCACTTCCTCTTTCT                                                                  |
| HuR                      | F:TCCGGCTGGTGCATTTTCAT<br>R:AGTCGCGGATCACTTTCACA                                                                     |
| MiR-15a                  | F:TGCGCTAGCAGCACATAATGGT<br>R:CCAGTGCAGGGTCCGAGGTATT<br>Loop:GTCGTATCCAGTGCAGGGTCCGAGGTATTCGCACTGGATA<br>CGACCACAAAC |
| GAPDH                    | F: AGAAGGCTGGGGCTCATTG<br>R: AGGGGCCATCCACAGTCTTC                                                                    |
| $\beta$ -actin           | F:AGCGAGCATCCCCAAAGTT<br>R:GGGCACGAAGGCTCATCATT                                                                      |
| U6                       | F:CTCGCTTCGGCAGCACA<br>R:AACGCTTCACGAATTTGCGT                                                                        |
| LncRNA-AK058003 fragment |                                                                                                                      |
| 1-1197nt                 | F:GGCATGGTGGCTCATGCCTGTACTC                                                                                          |
| 421-1197nt               | F:GGTTTCTACGTGCTTCCAGAG                                                                                              |
| 776-1197nt               | F:CTCAAGTGACTGAGGTGGG                                                                                                |
| 1197-1176nt              | R:GAGACGGAGTCTCGCCCTTTC                                                                                              |
| Aantisense               | F:GAGACGGAGTCTCGCCCTTTC<br>R:GGCATGGTGGCTCATGCCTGTAC                                                                 |

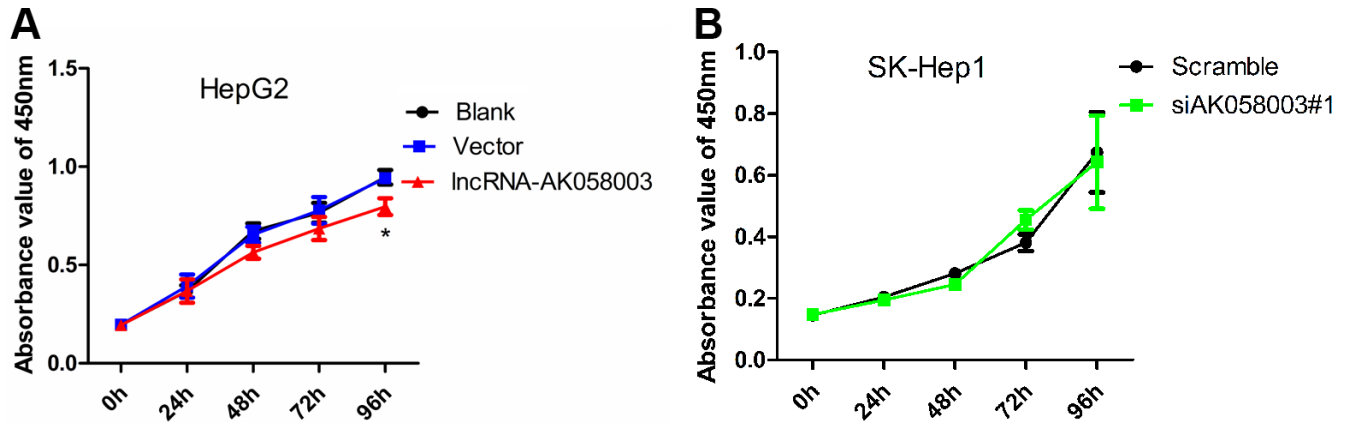

**Supplementary Figure S1:** (A) CCK8 assays showed that cell proliferation was suppressed by lncRNA-AK058003 overexpression in HepG2 cells. (B) The proliferation curves were not significantly different in lncRNA-AK058003 down-regulated SK-HeP1 cells. \* $p < 0.05$ .

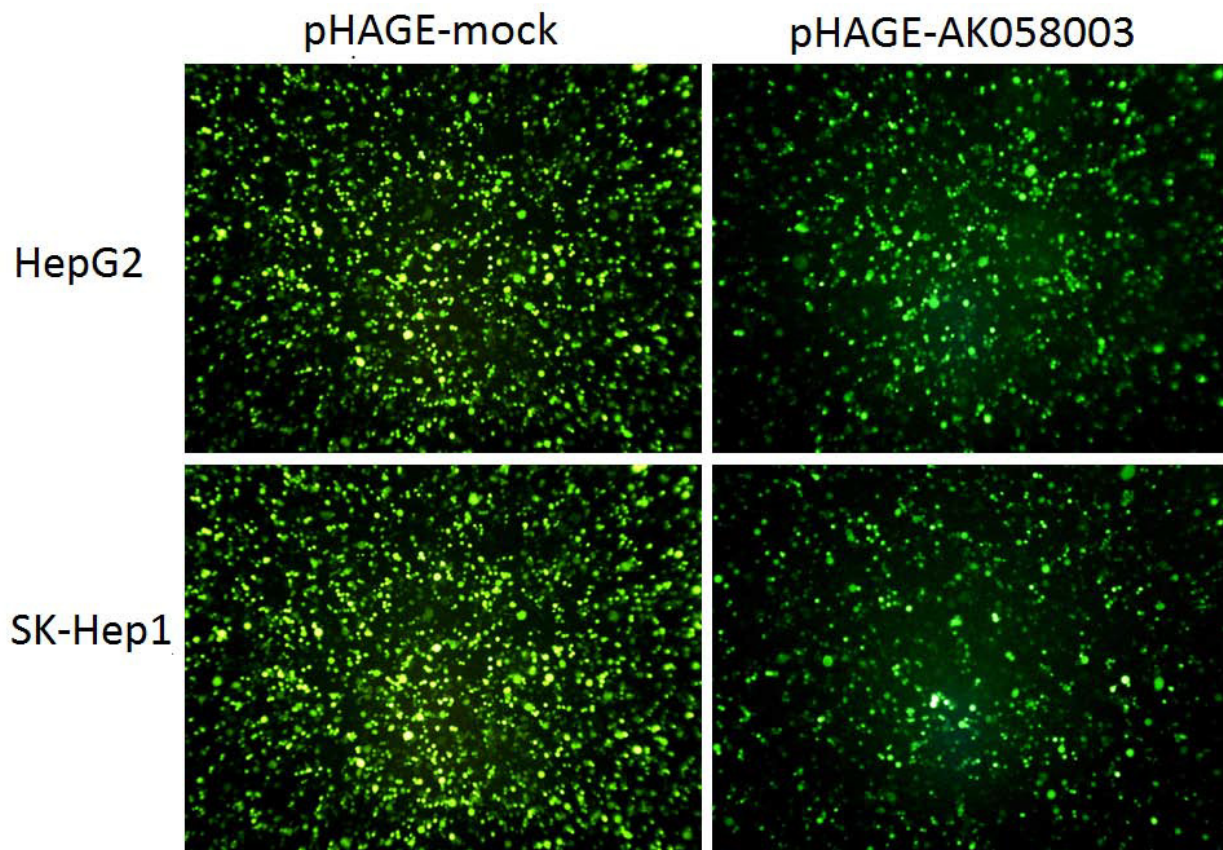

**Supplementary Figure S2:** The infection efficiency of the recombinant lentivirus (pHAGE) containing human lncRNA-AK058003 gene groups or pHAGE-mock groups in HepG2 and SK-HeP1 cells were determined by fluorescent microscopy. Original magnification,  $\times 100$ . Data based on three independent experiments.

### Biotinylated IRE RNA Control standards

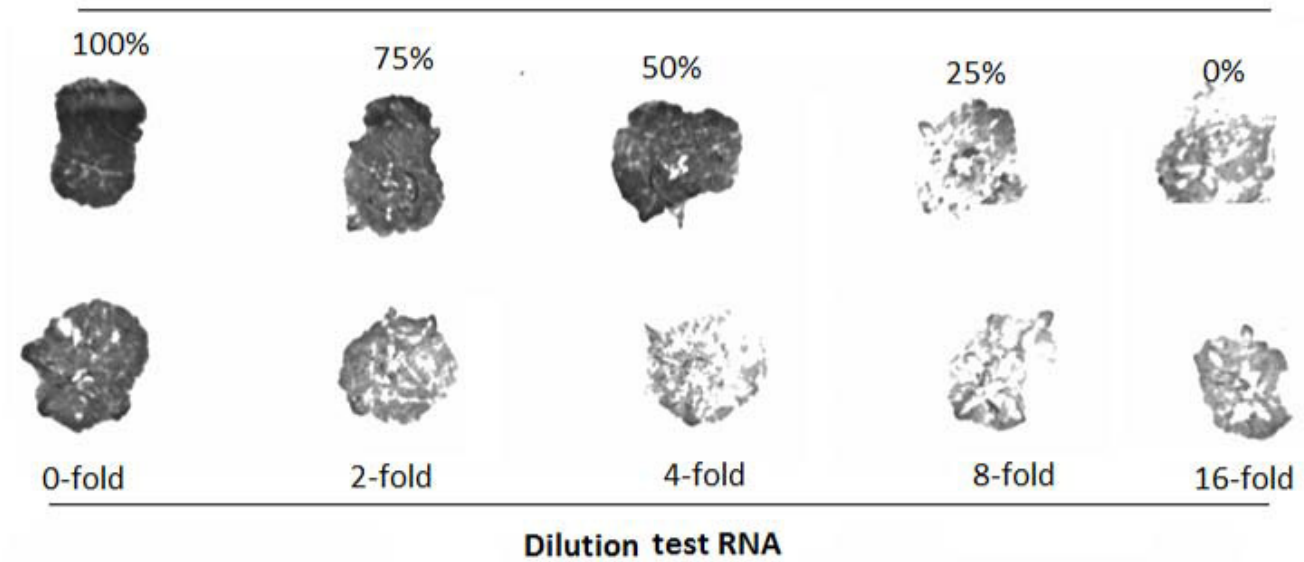

**Supplementary Figure S3: Biotinylated RNA efficiency by dot blotting analysis is shown.** A series of concentrations of biotinylated IRE RNA acted as standards.

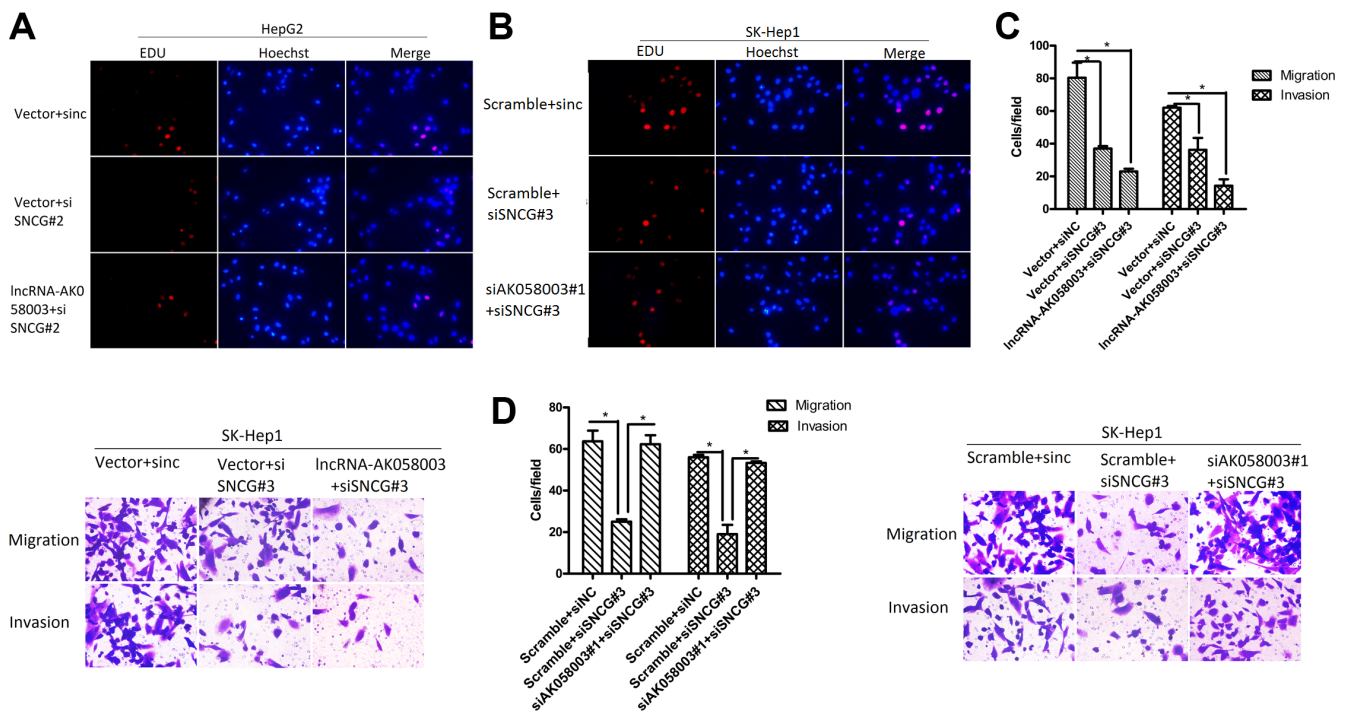

**Supplementary Figure S4: (A)** lncRNA-AK058003 and siSNCG co-transfection in HepG2 cells and **(B)** siAK058003#1 and siSNCG co-transfection in SK-Hep1 cell lines were seeded into 96 well plates and cell proliferation was assessed by EdU immunofluorescence staining. Original magnification,  $\times 400$ . The barplot on the right shows the percentage of EdU positive nuclei. **(C, D)** Transwell migration and invasion assays of SK-Hep1 cells were determined after co-transfection of lncRNA-AK058003 + siSNCG or siAK058003 + siSNCG. The graph on the left shows the positive cells per field. Original magnification,  $\times 400$ . Data are shown as the mean  $\pm$  S.E.M. based on three independent experiments. \* $p < 0.05$ , \*\* $p < 0.01$ , \*\*\* $p < 0.001$ .

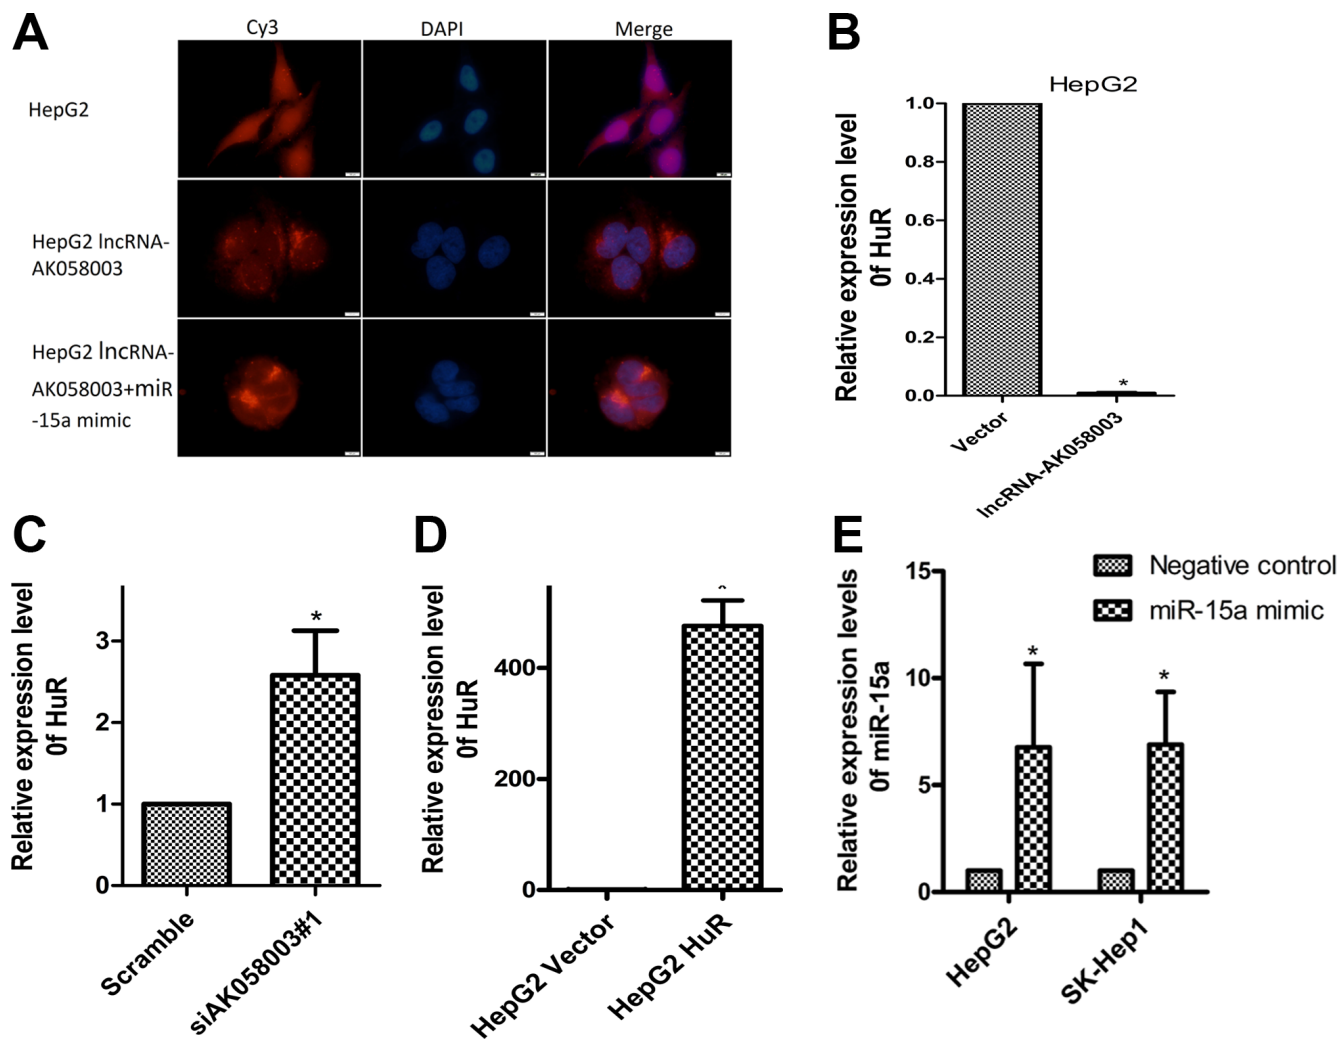

**Supplementary Figure S5:** (A) RNA FISH detection of lncRNA-AK058003. Fixed HepG2 cells with DAPI-stained nuclei (blue) were probed simultaneously for lncRNA-AK058003. Original magnification,  $\times 1000$ . (B, C) The expression of HuR had a negative correlation with lncRNA-AK058003. (D) qRT-PCR analysis shows the overexpressed level of HuR. (E) The expression of miR-15a in HCC cells after transfected miR-15a mimics. Data are shown as the mean  $\pm$  S.E.M. based on three independent experiments. \* $p < 0.05$ , \*\* $p < 0.01$ , \*\*\* $p < 0.001$ .
